# Supplementary material for: Teaching Quantum Neural Network (QNN) Concepts Through Artificial Neural Networks (ANNs): A Python Example Using the Iris Dataset
Source: Research Square preprint supplement (doi:10.21203/rs.3.rs-7660789/v1), 2025-09-22
Supplement: Supplementary file 1 [file 7154c30ab9993bc5aa83784d.docx]

Apendix

Box – 4 **Python code implementing the QNN training algorithm. The script simulates**

**the steps outlined in Box 3 using Qiskit: data encoding, variational circuit, measurement, loss evaluation, and parameter updates.**

*#Step 1: Load and prepare the data (Algorithm - Step 1)*

**from** **sklearn** **import** model_selection, datasets

**import** **numpy** **as** **np**

iris = datasets.load_iris()

X = iris.data[0:100] *# We use only two classes for binary #classification (setosa and versicolor)*

Y = iris.target[0:100]

*# Split into training and test sets (67% training, 33% testing)*

X_train, X_test, Y_train, Y_test = model_selection.train_test_split(X, Y, test_size=0.33, random_state=42)

*# Step 2: Define the feature map (Algorithm - Step 2)*

**from** **qiskit** **import** QuantumCircuit, Aer

**from** **qiskit.circuit** **import** QuantumRegister, ClassicalRegister

**def** feature_map(X, N=4, C=1):

*# Create N-qubit register and one classical bit for*

*# measurement*

q = QuantumRegister(N)

c = ClassicalRegister(C)

qc = QuantumCircuit(q, c)

*# Encode features into RX gate rotations*

**for** i, x **in** enumerate(X):

qc.rx(x, i)

**return** qc, c

qc.ry(theta[i], i)

**return** qc

*#Step 3: Define the variational circuit (Algorithm - Step 3)*

**def** variational_circuit(qc, theta):

*# Apply entangling CNOT gates in a ring structure*

**for** i **in** range(len(theta) - 1):

qc.cx(i, i+1)

qc.cx(len(theta) - 1, 0)

*# Apply trainable RY rotations (weights)*

**for** i **in** range(len(theta)):

qc.ry(theta[i], i)

**return** qc

*# Step 4: Build full QNN circuit and simulate (Algorithm - Step 4)*

**def** quantum_nn(X, theta, N=4, C=1):

qc, c = feature_map(X, N, C)

qc = variational_circuit(qc, theta)

qc.measure(0, c) *# Measure only qubit 0*

*# Simulate the circuit using qasm_simulator*

backend = Aer.get_backend('qasm_simulator')

job = qiskit.execute(qc, backend=backend, shots=10000)

result = job.result()

counts = result.get_counts(qc)

*# Return the probability of measuring '1'*

**return** counts.get('1', 0) / 10000

*# Step 5: Define loss function (Algorithm - Step 5)*

**def** calc_loss(prediction, target):

**return** (prediction - target)**2

*# Step 6: Estimate gradient via finite difference (Algorithm - Step 6)*

**import** **copy**

**def** gradient(X_i, Y_i, theta):

delta = 0.01

grad = []

**for** i **in** range(len(theta)):

dtheta = copy.deepcopy(theta)

dtheta[i] += delta

pred1 = quantum_nn(X_i, dtheta)

pred2 = quantum_nn(X_i, theta)

*# Estimate derivative*

grad.append((calc_loss(pred1, Y_i) - calc_loss(pred2, Y_i)) / delta)

**return** np.array(grad)

*# Step 7: Training loop with parameter updates (Algorithm - Step 7)*

**def** accuracy(X, Y, theta):

correct = 0

**for** x_i, y_i **in** zip(X, Y):

pred = quantum_nn(x_i, theta)

**if** pred < 0.5 **and** y_i == 0:

correct += 1

**elif** pred >= 0.5 **and** y_i == 1:

correct += 1

**return** correct / len(Y)

*# Initialize training parameters*

epochs = 30

eta = 0.05

theta = np.ones(4)

loss_list = []

print(f'Epoch**\t**Loss**\t**Accuracy')

**for** epoch **in** range(epochs):

losses = []

**for** x_i, y_i **in** zip(X_train, Y_train):

pred = quantum_nn(x_i, theta)

losses.append(calc_loss(pred, y_i))

grad = gradient(x_i, y_i, theta)

theta = theta - eta * grad

loss_epoch = np.mean(losses)

acc_epoch = accuracy(X_train, Y_train, theta)

loss_list.append(loss_epoch)

print(f'**{**epoch+1**}\t{**loss_epoch**:**.4f**}\t{**acc_epoch**:**.4f**}**')

*# Step 8: Visualize loss curve (Algorithm - Step 8)*

**import** **matplotlib.pyplot** **as** **plt**

plt.plot(loss_list)

plt.xlabel("Epoch")

plt.ylabel("Training Loss")

plt.title("Loss Curve During QNN Training")

plt.grid(**True**)

plt.show()

*# Evaluate model on test set*

final_accuracy = accuracy(X_test, Y_test, theta)

print(f"Test Accuracy: **{**final_accuracy**:**.4f**}**")
